# Supplementary material for: Introduction of a human- and keyboard-friendly N-glycan nomenclature
Source: publisher site journal article supplement (doi:10.3762/bjoc.20.53), 2024-03-15
Supplement: Additional file 1 [file 1860-5397-20-53-S1.pdf]

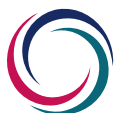

## Supporting Information

for

### Introduction of a human- and keyboard-friendly N-glycan nomenclature

Friedrich Altmann, Johannes Helm, Martin Pabst and Johannes Stadlmann

*Beilstein J. Org. Chem.* **2024**, *20*, 607–620. [doi:10.3762/bjoc.20.53](https://doi.org/10.3762/bjoc.20.53)

### Possible structure terms

## Appendix: A few possible “structure terms”:

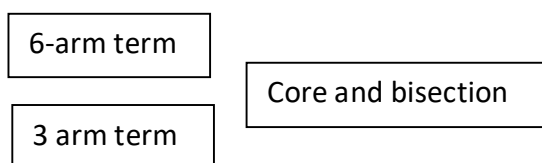

### Terms possible in both first (6-arm) and second (3-arm) position:

|                                                       |                                                                           |
|-------------------------------------------------------|---------------------------------------------------------------------------|
| Gn                                                    | a GlcNAc linked to the invariant pentasaccharide core                     |
| U                                                     | indicates no substituent of the $\beta$ -mannose.                         |
| A                                                     | Galactose linked to GlcNAc, linkage not specified                         |
| A <sup>4</sup> / A4                                   | Galactose $\beta$ 1,4-linked to GlcNAc                                    |
| A <sup>3</sup> / A3                                   | Galactose $\beta$ 1,3-linked to GlcNAc                                    |
| An <sup>4</sup> / An4                                 | GalNAc $\beta$ 1,4-linked to GlcNAc                                       |
| Na                                                    | Sialic acid linked to Gal-GlcNAc, linkages not specified                  |
| Na <sup>6-4</sup> / Na6-4                             | Neu5Ac- $\alpha$ 2,6-Gal-1,4-GlcNAc-                                      |
| Na <sup>3-3</sup> / Na3-3                             | Neu5Ac- $\alpha$ 2,3-Gal-1,3-GlcNAc-                                      |
| (Na <sup>6</sup> Na <sup>3-3</sup> )                  | Neu5Ac- $\alpha$ 2,6(Neu5Ac- $\alpha$ 2,3-Gal-1,3-)GlcNAc- (as in fetuin) |
| (AF) / (A <sup>4</sup> F <sup>3</sup> ) / (A4F3) / Lx | Lewis X determinant                                                       |
| (FA) / (F <sup>4</sup> A <sup>3</sup> ) / (F4A3) / La | Lewis A determinant                                                       |
| F <sup>2-3</sup> / Lh <sup>3</sup>                    | Blood group H determinant on type I chain                                 |
| F <sup>2-4</sup> / Lh <sup>4</sup>                    | Blood group H determinant on type II chain                                |
| La                                                    | Lewis A determinant = (FA)                                                |
| Lb                                                    | Lewis B determinant = (FA)                                                |
| Lh <sup>3</sup>                                       | Blood group H determinant on type I chain = F <sup>2-3</sup>              |
| Lh <sup>4</sup>                                       | Blood group H determinant on type II chain = F <sup>2-4</sup>             |
| Ln                                                    | LacNAc extension (Ln-, Ln <sup>3</sup> , Ln <sup>4</sup> )                |
| Lx                                                    | Lewis X determinant                                                       |
| Ly                                                    | Lewis Y determinant                                                       |
| A-Lb                                                  | alpha-Galactose bound to Lewis B = aka B Le <sup>b</sup>                  |
| An-Lh <sup>4</sup>                                    | N-acetylgalactosamine on a blood group H scaffold = Type II blood group A |

### Possible in first (6-arm) position:

|                                        |                                                                      |
|----------------------------------------|----------------------------------------------------------------------|
| M                                      | 6-arm mannose of the invariant pentasaccharide core                  |
| M <sup>3</sup> / M3                    | a mannose in 3-linkage to 6-arm mannose of the core                  |
| M <sup>6</sup> / M6                    | a mannose in 6-linkage to 6-arm mannose of the core; rare            |
| [GnGn]                                 | GlcNAc- $\beta$ 1,6-(GlcNAc- $\beta$ 1,2-)Man                        |
| [A <sup>4</sup> A <sup>4</sup> ]       | branched 6-arm with two Gal residues (in analogy to [GnGn])          |
| [Na <sup>6-4</sup> Na <sup>6-4</sup> ] | branched 6-arm with two terminal sialic acids (in analogy to [GnGn]) |
| etc.                                   |                                                                      |

### Possible in second (3-arm) position:

|   |                                                     |
|---|-----------------------------------------------------|
| M | 3-arm mannose of the invariant pentasaccharide core |
|---|-----------------------------------------------------|

M<sup>2</sup> / M2      a mannose in 2-linkage to the invariant pentasaccharide core  
 M<sup>2-2</sup> / M2-2    two mannoses in series  
 [GnGn]        GlcNAc-β1,4-(GlcNAc-β1,2-)Man (in analogy to [GnGn])  
 [A<sup>4</sup>A<sup>4</sup>]        branched 3-arm with two Gal residues (in analogy to [GnGn])  
 [Na<sup>6-4</sup>Na<sup>6-4</sup>]    branched 3-arm with two terminal sialic acids (in analogy to [GnGn])  
 etc.

Possible in the extension positions: – if present; fucosylation before bisection

F<sup>6</sup>    / F6      α1,6-fucosylation of reducing end GlcNAc  
 F<sup>3</sup>    / F3      α1,3-fucosylation of reducing end GlcNAc  
 F<sup>3</sup>F<sup>6</sup> / F3F6    difucosylation of reducing end GlcNAc  
 X                β1,2-xylosylation of the β-mannose (written before fucosylation)  
 bi                indicates presence of a bisecting GlcNAc  
 A-bi             bisecting LacNAc  
 (AF)-bi        bisecting Lewis X

Order of extension terms:

[1] Xyl – [2] substituents of reducing GlcNAc (3 before 6) – [3] bisecting GlcNAc

Non-sugar substituents

ac                acetyl  
 me                methyl  
 pc                phosphocholine  
 pe                phosphoethanolamine  
 po                phosphate  
 su                sulfate  
 ....
